# Supplementary material for: Knowledge, attitudes and bite prevention practices and estimation of productivity of vector breeding sites using a Habitat Suitability Score (HSS) among households with confirmed dengue in the 2014 outbreak in Dar es Salaam, Tanzania
Source: PubMed Central journal article supplement (PMC7363105; doi:10.1371/journal.pntd.0007278), 2020-07-02
Supplement: pntd.0007278.s001.pdf [file pntd.0007278.s001.pdf]

## HOUSEHOLD QUESTIONNAIRE

Introduction: Hello, my name is “.....”. I am from IHI and work on a project investigating where Dengue is found in Dar es Salaam. We would like to ask you some questions.

### To be filled in before the interview

0.1 Code of interviewer |\_\_|\_\_|

0.2 Date of interview |\_\_|\_\_| / |\_\_|\_\_| / |\_\_|\_\_|\_\_|\_\_| (Day/Month/Year)

0.3 Name of district |\_\_\_\_\_|

0.4 Name of ward |\_\_\_\_\_|

0.6 GPS coordinates of household: S: |\_\_|\_\_|\_\_|\_\_|\_\_| E |\_\_|\_\_|\_\_|\_\_|\_\_|

0.7 Did you or a member of your household recently have a case of Dengue?  Yes  
 No – STOP

0.8 INFORMED CONSENT OBTAINED:  Yes  
 No – STOP

### Section 1: Household characteristics

**“Now I would like to ask you some general questions about this household.”**

| Q # | Questions and filters               | Coding category                                                                                    | Answer (enter coding categories) |
|-----|-------------------------------------|----------------------------------------------------------------------------------------------------|----------------------------------|
| 1.1 | Who is responding to the questions? | 01...Head of household<br>02...Partner of household head<br>03...Other adult in household, specify | __ __ <br>_____                  |
| 1.2 | How old is the respondent?          | <b>Age in years</b>                                                                                | __ __  if less than 18, STOP     |

|      |                                                                 |                                                                                                                                                                                                                                                             |                   |
|------|-----------------------------------------------------------------|-------------------------------------------------------------------------------------------------------------------------------------------------------------------------------------------------------------------------------------------------------------|-------------------|
| 1.3  | What is the main source of income in the household head?        | 01...Salary<br>02...Business<br>03...Farming/livestock keeping<br>04...Skilled labour (fundi)<br>05...Casual labour (kibarua)<br>06...Fishing<br>07...Driver/taxi/bajaji<br>08...Student<br>09...Pension<br>10...No source of income<br>11...Other, specify | _ _ <br><br>_____ |
| 1.4  | What is the main material of the roof?<br><b>Observe</b>        | 01...Grass /palm thatch<br>02...Corrugated iron sheets<br>03... Other metal, e.g. korie<br>04... Other, specify                                                                                                                                             | _ _ <br><br>_____ |
| 1.5  | What is the main material of the walls?<br><b>Observe</b>       | 01...Mud and sticks<br>02...Burned bricks<br>03...Cement bricks<br>04...Mud bricks (Matofali mabichi)<br>05...Other, specify                                                                                                                                | _ _ <br><br>_____ |
| 1.6  | What is the main material of the floor?<br><b>Observe</b>       | 01...Earth<br>02...Cement<br>03...Tiles<br>04...Wood<br>05...Other, specify                                                                                                                                                                                 | _ _ <br><br>_____ |
| 1.7  | Are any of the windows screened with netting?<br><b>Observe</b> | 01...Yes<br>00...No, <b>go to 1.8</b>                                                                                                                                                                                                                       | _ _               |
| 1.7a | What are the windows screened with?<br><b>Observe</b>           | 01...Wire mesh (metal/plastic)<br>02...Old bednet<br>03...Other material, specify                                                                                                                                                                           | _ _ <br><br>_____ |
| 1.8  | Does the house have an open eave gap? <b>Observe</b>            | 01...Yes<br>00...No                                                                                                                                                                                                                                         | _ _               |
| 1.9  | What is the main type of ceiling?<br><b>Observe</b>             | 01...No ceiling<br>02...Wooden boards (unfitted)<br>03...Wooden plates or fitted boards<br>04...Gypsum<br>05...Traditional e.g. leaves, mud<br>06...Other, specify                                                                                          | _ _ <br><br>_____ |



|      |                                                                                                                                     |                     |                                                                                                                              |                                                                                                                                                                                                                                                                                                                                                                                                                                                                                                                                                                |
|------|-------------------------------------------------------------------------------------------------------------------------------------|---------------------|------------------------------------------------------------------------------------------------------------------------------|----------------------------------------------------------------------------------------------------------------------------------------------------------------------------------------------------------------------------------------------------------------------------------------------------------------------------------------------------------------------------------------------------------------------------------------------------------------------------------------------------------------------------------------------------------------|
| 1.15 | Does the household (any member) have any of the following means of transport?<br><br><b>Prompt each category</b>                    | 01...Yes<br>00...No | Bicycle<br>Motorbike<br>Car/Truck<br>Bajaji<br>Animal/Cart<br>Boat/Canoe/Dhow<br>None of the above                           | <input type="checkbox"/> <input type="checkbox"/> <input type="checkbox"/><br><input type="checkbox"/> <input type="checkbox"/> <input type="checkbox"/> |
| 1.16 | Does the household have any of the following close to the house?<br><br><b>Observe a 20metre radius around the house do not ask</b> | 01...Yes<br>00...No | Water storage jars<br>Plant pots<br>Discarded containers<br>Plastic bags<br>Car tyres<br>Pools of water<br>None of the above | <input type="checkbox"/> <input type="checkbox"/> <input type="checkbox"/><br><input type="checkbox"/> <input type="checkbox"/> <input type="checkbox"/> |

**Section 2: I would like to ask you some questions about your past travel and work place**

|     |                                                                                                                                         |                     |                                                                                                                                           |                                                                                                                                                                                                                                                                                                                                                                                                                                                                                                                                                                                                                                                                                                                            |
|-----|-----------------------------------------------------------------------------------------------------------------------------------------|---------------------|-------------------------------------------------------------------------------------------------------------------------------------------|----------------------------------------------------------------------------------------------------------------------------------------------------------------------------------------------------------------------------------------------------------------------------------------------------------------------------------------------------------------------------------------------------------------------------------------------------------------------------------------------------------------------------------------------------------------------------------------------------------------------------------------------------------------------------------------------------------------------------|
| 2.1 | Where did you travel to in the past two weeks before you had dengue fever?<br><br><b>Prompt each category</b>                           | 01...Yes<br>00...No | Did Not travel<br>Up country<br>East Africa<br>Other Africa<br>Middle East/ Arab<br>Asia<br>America<br>South America<br>Australia/Oceania | <input type="checkbox"/> <input type="checkbox"/> <input type="checkbox"/><br><input type="checkbox"/> <input type="checkbox"/> <input type="checkbox"/> |
| 2.2 | Do you commute to your working place/ business?<br><br><b>Prompt if working place is area near home which doesn't require commuting</b> | 01...Yes<br>00...No | Do not travel<br>Once a day<br>Frequently in a day<br>Weekly<br>Monthly                                                                   | <input type="checkbox"/> <input type="checkbox"/> <input type="checkbox"/><br><input type="checkbox"/> <input type="checkbox"/> <input type="checkbox"/>                                                                                                                                                                                                                                                                                                                         |
|     |                                                                                                                                         |                     |                                                                                                                                           |                                                                                                                                                                                                                                                                                                                                                                                                                                                                                                                                                                                                                                                                                                                            |

**Section 3: "Now I would like to ask you some questions about dengue."**

|     |                                                                                         |                     |                                            |                                                                                                                                                                                                                                        |
|-----|-----------------------------------------------------------------------------------------|---------------------|--------------------------------------------|----------------------------------------------------------------------------------------------------------------------------------------------------------------------------------------------------------------------------------------|
| 3.1 | How is dengue spread?<br><br><b>Do not Prompt but discuss and check each answer you</b> | 01...Yes<br>00...No | Human-human<br>Mosquito bite<br>Don't know | <input type="checkbox"/> <input type="checkbox"/> <input type="checkbox"/><br><input type="checkbox"/> <input type="checkbox"/> <input type="checkbox"/><br><input type="checkbox"/> <input type="checkbox"/> <input type="checkbox"/> |
|-----|-----------------------------------------------------------------------------------------|---------------------|--------------------------------------------|----------------------------------------------------------------------------------------------------------------------------------------------------------------------------------------------------------------------------------------|

|                                                                                                         |                                                                                                                                                                                                                                           |                     |                                                                                  |                                                                                                                     |
|---------------------------------------------------------------------------------------------------------|-------------------------------------------------------------------------------------------------------------------------------------------------------------------------------------------------------------------------------------------|---------------------|----------------------------------------------------------------------------------|---------------------------------------------------------------------------------------------------------------------|
|                                                                                                         | <b>hear mentioned</b>                                                                                                                                                                                                                     |                     | Other                                                                            | _ _ <br>_____                                                                                                       |
| 3.2                                                                                                     | How can you stop dengue from spreading?<br><br><b>Do not Prompt but discuss and check each answer you hear mentioned</b>                                                                                                                  | 01...Yes<br>00...No | Control mosquitoes / stop mosquito bites<br><br>Take medicine                    | _ _ <br> _ _                                                           |
| 3.2                                                                                                     | What are the symptoms of dengue?<br><br><b>Prompt each category</b>                                                                                                                                                                       | 01...Yes<br>00...No | Fever<br>Headache<br>Joints hurt<br>Feeling sick/vomiting<br>Don't know<br>Other | _ _ <br> _ _ <br>_____                                                 |
| <b>Section 4: "Now I would like to ask you some questions about your bednets and mosquito control."</b> |                                                                                                                                                                                                                                           |                     |                                                                                  |                                                                                                                     |
| 4.1                                                                                                     | How many sleeping places are there in your household?<br><br><b>Include all sleeping spaces where a net could be hung up, or has ever been hung up, including if there is more than one sleeping space in each room used for sleeping</b> |                     |                                                                                  | Indoors  _ _ _ <br>Outdoors  _ _ _ <br>Indoors Temporary  _ _ _ <br>Outdoors Temporary  _ _ _                       |
| 4.1a                                                                                                    | How many sleeping places were used last night in your household?                                                                                                                                                                          |                     |                                                                                  | Indoors  _ _ _ <br>Outdoors  _ _ _ <br>Indoors Temporary  _ _ _ <br>Outdoors Temporary  _ _ _                       |
| 4.2                                                                                                     | How many mosquito nets that can be used for sleeping does your household have in total?<br><br><b>Probe for nets not in use: stored, saved, unopened</b>                                                                                  |                     |                                                                                  | _ _                                                                                                                 |
| 4.3                                                                                                     | Which methods do you use to stop Dengue mosquitoes biting you?<br><br><b>Do not Prompt but discuss and check each answer you hear mentioned</b>                                                                                           | 01...Yes<br>00...No |                                                                                  | Bednet  _ _ _ <br>Long clothes  _ _ _ <br>Screen house  _ _ _ <br>Spray insecticide  _ _ _ <br>Mosquito coil  _ _ _ |

|     |                                                                            |                                                                                                                                                                                                          |                                                                                                                                                                                                                                                                                                                                                                      |
|-----|----------------------------------------------------------------------------|----------------------------------------------------------------------------------------------------------------------------------------------------------------------------------------------------------|----------------------------------------------------------------------------------------------------------------------------------------------------------------------------------------------------------------------------------------------------------------------------------------------------------------------------------------------------------------------|
|     |                                                                            |                                                                                                                                                                                                          | <p>Clean vegetation around house<br/> _ _ </p> <p>Use a fan  _ _ </p> <p>Use an electricutor  _ _ </p> <p>Mosquito repellent cream/lotion<br/> _ _ </p> <p>Empty water from trash or<br/>containers around the house<br/> _ _ </p>                                                                                                                                   |
| 4.4 | Where do you use these methods?                                            | <p>00...Indoors</p> <p>01...Outdoors</p> <p>02...Indoors and outdoors</p>                                                                                                                                | <p>Bednet  _ _ </p> <p>Long clothes  _ _ </p> <p>Screen house  _ _ </p> <p>Spray insecticide  _ _ </p> <p>Mosquito coil  _ _ </p> <p>Use a fan  _ _ </p> <p>Use an electricutor  _ _ </p> <p>Mosquito repellent cream/lotion<br/> _ _ </p>                                                                                                                           |
| 4.5 | What time of day do you normally use these methods to stop mosquito bites? | <p>00...Evening</p> <p>01...Night</p> <p>02...Evening and night</p>                                                                                                                                      | <p>Bednet  _ _ </p> <p>Long clothes  _ _ </p> <p>Screen house  _ _ </p> <p>Spray insecticide  _ _ </p> <p>Mosquito coil  _ _ </p> <p>Use a fan  _ _ </p> <p>Use an electricutor  _ _ </p> <p>Mosquito repellent cream/lotion<br/> _ _ </p>                                                                                                                           |
| 4.6 | How often do you normally use these methods to stop mosquito bites?        | <p>00...Daily</p> <p>01...Several times a week</p> <p>02...About one time a week</p> <p>03...Less than one time a week</p> <p>04...When mosquitoes are a nuisance</p> <p>91...Don't Know/ Don' t use</p> | <p>Bednet  _ _ </p> <p>Long clothes  _ _ </p> <p>Screen house  _ _ </p> <p>Spray insecticide  _ _ </p> <p>Mosquito coil  _ _ </p> <p>Use a fan  _ _ </p> <p>Use an electricutor  _ _ </p> <p>Mosquito repellent cream/lotion<br/> _ _ </p> <p>Clean vegetation around house<br/> _ _ </p> <p>Empty water from trash or<br/>containers around the house<br/> _ _ </p> |

|     |                                                                                                                                                                                                                                                                                                               |  |                                                                                                                                                                                                                                                                                       |
|-----|---------------------------------------------------------------------------------------------------------------------------------------------------------------------------------------------------------------------------------------------------------------------------------------------------------------|--|---------------------------------------------------------------------------------------------------------------------------------------------------------------------------------------------------------------------------------------------------------------------------------------|
| 4.7 | <p>What do you (or the person who had dengue if under 18) do in the evenings after about 4pm until you go to bed?</p> <p><b>Try to talk about this and get some idea of the times when these activities are taking place.</b></p> <p><b>Write the time that the person is doing each activity roughly</b></p> |  | <p>At work  _ _ - _ _ </p> <p>Coming home from work<br/> _ _ - _ _ </p> <p>Visit friends  _ _ - _ _ </p> <p>Go to a bar / restaurant<br/> _ _ - _ _ </p> <p>Activities inside the house<br/> _ _ - _ _ </p> <p>Sit outside the house<br/> _ _ - _ _ </p> <p>Go to bed  _ _ - _ _ </p> |
|-----|---------------------------------------------------------------------------------------------------------------------------------------------------------------------------------------------------------------------------------------------------------------------------------------------------------------|--|---------------------------------------------------------------------------------------------------------------------------------------------------------------------------------------------------------------------------------------------------------------------------------------|
