# Supplementary material for: Knowledge, attitudes and bite prevention practices and estimation of productivity of vector breeding sites using a Habitat Suitability Score (HSS) among households with confirmed dengue in the 2014 outbreak in Dar es Salaam, Tanzania
Source: PubMed Central journal article supplement (PMC7363105; doi:10.1371/journal.pntd.0007278), 2020-07-02
Supplement: pntd.0007278.s002.pdf [file pntd.0007278.s002.pdf]

**ROUTINE BREEDING SITE SURVEYS – FIELD FORM**

**DODOSO LA UKAGUZI WA MAZALIA**

(TO BE FILLED IN FULL AT THE HOME VISIT)

(LIJAZWE KIKAMILIFU UNAPO ITEMBELEA KAYA)

Photo Number:/Namba ya picha | \_\_\_\_\_ | Sample serial/Namba | \_\_\_\_\_ |  
 K M M S S E E D D  
 Number of ward\_Kata/Mtaa/South/East/Dip

0.0 Number of interviewee/ Namba ya mdodoswaji | \_\_\_\_\_ |

0.1 Code of interviewer/Namba ya mdodosaji | \_\_\_\_\_ |

0.2 Date of interview/Tarahe ya mahojiano | \_\_\_\_\_ | / | \_\_\_\_\_ | / | \_\_\_\_\_ | (Day/Month/Year)

0.3 Name of district/Jina la Wilaya | \_\_\_\_\_ |

0.4 Name of ward/Jina la Kata | \_\_\_\_\_ |

0.5 Street Name/ Jina la Mtaa | \_\_\_\_\_ |

0.6 GPS coordinates /Namba za GPS kaya ilipo: S: | \_\_\_\_\_ | E | \_\_\_\_\_ |

0.7 Je (Jina).....ulipo/alipo ugua dengue ulikuwa unaishi hapa **Ndiyo** | \_\_\_\_\_ | Endelea na udodosaji  
**Hapana** | \_\_\_\_\_ | Usiendelee,

**Larval sampling/Sampuli ya viluilui:**

0.1 Number of dips: Idadi ya mazalia/ Breeding Habitat | \_\_\_\_\_ |

0.2 Larvae present?/ Kiluilui yupo.

**Culicine Y / N**

**Anopheines Y / N**

**Aedes Y/N**

**Habitat Type/Hali ya Mazingira (check if positive for Aedes larvae/ angalia uwepo wa viluilui wa Aedes)**

|                                            |                          |                                        |                          |
|--------------------------------------------|--------------------------|----------------------------------------|--------------------------|
| Dry / Pakavu                               | <input type="checkbox"/> | Discarded container/ Makopo yaliozagaa | <input type="checkbox"/> |
| Ground pool/ Maji yaliyokusanywa           | <input type="checkbox"/> | Plastic bag/ Mifuko ya Plastiki        | <input type="checkbox"/> |
| Stream / River margin/ Mfereji / kijito    | <input type="checkbox"/> | Puddle / Hoof print/ Alama za kwato    | <input type="checkbox"/> |
| Agricultural overflow/ Mafuriko            | <input type="checkbox"/> | Car tyre/ Matairi ya gari              | <input type="checkbox"/> |
| Water storage jar / bucket/ Ndoo na madumu | <input type="checkbox"/> | Brick or sand pit/ Mashimo ya udongo   | <input type="checkbox"/> |
| Plant pot / Makopo ya maua                 | <input type="checkbox"/> |                                        |                          |

**Shade over habitat/ Kivuli juu ya mazalia**

|                    |                          |
|--------------------|--------------------------|
| None/ Hakuna       | <input type="checkbox"/> |
| Partial/ Kwa kiasi | <input type="checkbox"/> |
| Heavy/Sana         | <input type="checkbox"/> |

**Habitat size: perimeter Ukubwa wa mazalia:mzingo**

|                                     |                          |
|-------------------------------------|--------------------------|
| Less than 10 cm/ Chini ya 10cm      | <input type="checkbox"/> |
| Between 10-100 cm/ Kati ya 10-100cm | <input type="checkbox"/> |
| More than 100 cm /Zaidi ya 100cm    | <input type="checkbox"/> |

**Water movement/ Mtiririko wa maji**

Stagnant/ Yametuama

Slow/ Taratibu

Fast/ Kasi

**Water colour / Rangi ya maji**

Clear/ Masafi

Coloured/ Yana rangi rangi

Polluted/ Machafu

**Water type: Aina ya Maji**

Permanent/ Yapo sikuzote

Semi-permanent/ Si ya kudumu

Temporary/ Ya Muda

**Water depth/ Kina cha maji**

Less than 5 cm/ Chini ya 5cm

Between 5-15 cm/ Kati ya 5-15 cm

More than 15 cm/ Zaidi ya 15 cm

**Environment (around water habitat) Eneo linalozunguka maji** - multiple ticks allowed / Yawezakuwa na jibu zaidi ya moja

**Distance from homes: Umbali toka nyumba ilipo**

Scrub/Bush/ Kichaka

Swamp/marsh: Tindiga

Urban/ Eneo la Mjini

Cultivated fields/ Shamba lililolimwa

Less than 100 m/ Chini ya 100m

Between 100-500 m/ Kati ya 100-500m

More than 500 m/ Zaidi ya 500m
